1 **High effectiveness of multimodal infection control interventions in preventing SARS-CoV-2**  
2 **infections in healthcare professionals: a prospective longitudinal seroconversion study**

3

4 Thomas Theo Brehm, MD<sup>1,2,#</sup>, Dorothee Schwinge, PhD<sup>1,#</sup>, Sibylle Lampalzer, MD<sup>1</sup>, Veronika  
5 Schlicker, BA<sup>1,2</sup>, Julia Küchen<sup>1</sup>, Michelle Thompson<sup>1</sup>, Felix Ullrich<sup>1</sup>, Samuel Huber, MD<sup>1</sup>,  
6 Stefan Schmiedel, MD<sup>1,2</sup>, Marylyn M Addo, MD<sup>1,2</sup>, Marc Lütgehetmann, MD<sup>2,3</sup>, Johannes K  
7 Knobloch, MD<sup>2,3</sup>, Julian Schulze zur Wiesch, MD<sup>1,2,#</sup>, Ansgar W Lohse, MD<sup>1,2,#</sup>

8

9 <sup>1</sup>I. Department of Internal Medicine, University Medical Center Hamburg-Eppendorf,  
10 Martinistraße 52, 20249 Hamburg, Germany

11 <sup>2</sup> German Center for Infection Research (DZIF), Partner Site Hamburg-Lübeck-Borstel-Riems

12 <sup>3</sup> Institute of Medical Microbiology, Virology and Hygiene, University Medical Center  
13 Hamburg-Eppendorf, Martinistraße 52, 20249 Hamburg, Germany

14 # contributed equally

15

16

17

18

19

20

21

22

23

24

25

26

27

28

29

30

31

32

**NOTE: This preprint reports new research that has not been certified by peer review and should not be used to guide clinical practice.**

33 **Objective:** To assess the effectiveness of multimodal infection control interventions in the  
34 prevention of SARS-CoV-2 infections in healthcare professionals

35

36 **Design:** Sequential follow-up study

37

38 **Setting:** Largest tertiary care centre in northern Germany

39

40 **Participants:** 1253 employees of the University Medical Center Hamburg-Eppendorf were  
41 sequentially assessed for the presence of SARS-CoV-2 IgG antibodies at the beginning of the  
42 covid-19 epidemic (20 March – 9 April), one month (20 April – 8 May), and another two  
43 months later (22 June – 24 July). Of those, 1026 were healthcare workers (HCWs) of whom  
44 292 were directly involved in the care of covid-19 patients. During the study period, infection  
45 control interventions were deployed, those included i) strict barrier nursing of all known  
46 covid-19 patients including FFP2 (N95) masks, goggles, gloves, hoods and protective gowns,  
47 ii) visitor restrictions with access control at all hospital entries, iii) mandatory wearing of  
48 disposable face masks in all clinical settings, and iv) universal RT-PCR admission screening of  
49 patients.

50

51 **Main Outcome Measures:** SARS-CoV-2 IgG seroconversion rate

52

53 **Results:** At the initial screening, ten participants displayed significant IgG antibody ratios.  
54 Another ten individuals showed seroconversion at the second time point one month later,  
55 only two further participants seroconverted during the subsequent two months. The overall  
56 SARS-CoV-2 seroprevalence in the study cohort at the last follow-up was 1.8%, the  
57 seroconversion rate dropped from 0.81% to 0.08% per month despite a longer observation  
58 period. Amongst HCWs seropositivity was increased in those directly involved in the care of  
59 patients with SARS-CoV-2 infections (3.8%, n=11) compared to other HCWs (1.4%, n=10,  
60 P=0.025). However, after the adoption of all multimodal infection control interventions  
61 seroconversions were observed in only two more HCWs, neither of whom were involved in  
62 inpatient care.

63

64 **Conclusion:** Multimodal infection control and prevention interventions are highly effective in  
65 mitigating SARS-CoV-2 infections of healthcare professionals.

66

67

68

69

70

71

72

73

74

75

76

77

78

79

80

81

82

83

84

85

86

87

88

89

90

91

92

93

94

95

96 **INTRODUCTION**

97 Healthcare workers (HCWs) are at the front line of the coronavirus disease 2019 (covid-19)  
98 pandemic response and disproportionately at risk of contracting severe acute respiratory  
99 syndrome coronavirus 2 (SARS-CoV-2) due to occupational exposure.<sup>1 2</sup> The Chinese  
100 ophthalmologist Li Wenliang, who was one of the first physicians to issue emergency warnings  
101 about a novel viral pneumonia that was later identified as covid-19 died after being infected  
102 when caring for a pre-symptomatic patient.<sup>3</sup> This individual case as well as larger case series  
103 illustrate the considerable challenges of HCW protection, especially since the risk of infections  
104 from pre- or asymptomatic SARS-CoV-2 infected individuals was initially often  
105 underestimated.<sup>4 5</sup> Protection of HCWs from infection requires not only strict application of  
106 personal protective equipment (PPE), but also the prompt identification of infected  
107 individuals, who may be asymptomatic or oligosymptomatic. Protection of HCWs not only  
108 serves as personal protection but is also paramount to mitigate nosocomial transmission to  
109 vulnerable patients and fellow HCWs. HCW infections may also lead to critical staff shortages.  
110 Various infection prevention and control interventions have been adapted worldwide with  
111 various efficacies, including the use of adequate PPE<sup>6-8</sup>, universal admission screening of  
112 patients<sup>9 10</sup>, and RT-PCR surveillance of exposed HCWs.<sup>11 12</sup> However, reports about limited  
113 availability of sufficient PPE and high infection rates in HCWs, particularly during the early  
114 phase of the outbreak, have raised concerns about whether HCWs can be adequately  
115 protected from contracting occupational infections.<sup>13 14</sup> The World Health Organization  
116 recently reported that HCWs account for over 10% of overall global covid-19 cases.<sup>15</sup> While  
117 strict adherence to adequate PPE in areas caring for covid-19 patients is of major importance,  
118 this alone may be insufficient in protecting HCWs and in preventing nosocomial infections  
119 due to the infectious risk posed by as yet unidentified patients and colleagues. The aim of our  
120 study was to prospectively evaluate the effectiveness of sequentially instituted multimodal  
121 infection control interventions at our large tertiary care centre by sequential seroprevalence  
122 measurements and assessment of seroconversion rates amongst the various hospital  
123 workers.

124

125

126

127

## 128 **METHODS**

### 129 **Study design**

130 Participants were recruited in the screening period 1 (SP 1) between 20 March and 9 April  
131 2020 by informing employees of the University Medical Center Hamburg-Eppendorf. The city-  
132 state of Hamburg with 1.8 million inhabitants and a metropolitan catchment area of more  
133 than 4.5 million inhabitants was affected by the pandemic relatively early due to public  
134 holidays in March 2020, when numerous travelers returned from high-risk regions, especially  
135 Italian and Austrian ski resorts. By 24 July, a total of 5291 cases had been confirmed, which  
136 constitutes one of the highest rates in Germany.<sup>16</sup> The University Medical Center Hamburg-  
137 Eppendorf, which has 1738 hospital beds, has treated more than 170 covid-19 patients during  
138 the study period. Of those, 70 were admitted to the intensive care unit, 51 required  
139 mechanical ventilation, and 12 patients required extracorporeal membrane oxygenation  
140 (ECMO) therapy. Of note, a large number of immunocompromised patients with high viral  
141 loads and a protracted course of disease posed a particularly high transmission risk to HCWs.<sup>17</sup>  
142 Participants were recruited to the study via an internal email newsletter. To assess the  
143 infection rate of employees, we assessed seroconversion at one and three months: i) sampling  
144 period 2 (SP 2) one month after SP 1 (20 April to 8 May 2020) and ii) sampling period 3 (SP 3)  
145 another 2 months after SP 2 (22 June to 24 July).

146

### 147 **Data collection**

148 On the day of recruitment, we collected demographic and general work-related data including  
149 profession, occupational area, and patient contacts using a questionnaire. In addition, we  
150 used another questionnaire to assess known and possible past contact to covid-19 patients  
151 with or without sufficient PPE as well as presence of symptoms during the past 4 weeks at SP  
152 1 and SP 2 and during the past 8 weeks at SP 3 respectively. Fever, cough, and dyspnea were  
153 classified as typical symptoms while rhinorrhea, sore throat, headache, stomach pain, joint  
154 and muscle pain, nausea, and diarrhea and were considered as uncharacteristic symptoms.  
155 Questionnaires were available both paper-based and via online REDcap electronic data  
156 capture tools hosted at our institution.<sup>18 19</sup> Study participants with positive SARS-CoV-2 IgG  
157 ratio were contacted again by phone to ask if nasopharyngeal swabs for RT-PCR had been  
158 performed and whether a source of infection could be identified.

159

160 **Infection control interventions**

161 A number of infection control measures were undertaken at our institution listed in table 1.

162

163

164 **Table 1 – Infection control interventions at the University Medical Center Hamburg-**  
165 **Eppendorf and in Hamburg, Germany**

166

| <b>Interventions at the University Medical Center Hamburg-Eppendorf</b> |                                                                                             |
|-------------------------------------------------------------------------|---------------------------------------------------------------------------------------------|
| 27 February                                                             | Opening of an on-campus covid-19 testing clinic                                             |
| 11 March                                                                | Cancellation of all meetings not directly related to patient care                           |
| 18 March                                                                | Mandatory wearing of face masks in the emergency department                                 |
| 19 March                                                                | Implementation of visitor restrictions                                                      |
| 22 March                                                                | Mandatory wearing of face masks in all clinical settings                                    |
| 10 April                                                                | Mandatory wearing of FFP2 masks at all oncology and haematology wards and clinics           |
| 20 April                                                                | Universal RT-PCR admission screening of patients                                            |
| 11 May                                                                  | Universal RT-PCR screening of employees caring for covid-19 patients or vulnerable patients |
| <b>Interventions in Hamburg, Germany</b>                                |                                                                                             |
| 16 March                                                                | Closure of educational facilities                                                           |
| 22 March                                                                | Stay at home order                                                                          |
| 27 April                                                                | Mandatory wearing of face masks                                                             |

167

168

169 As a large tertiary referral centre and one of the major infectious diseases units of the country,  
170 we have highly trained personnel and a specialized infectious disease ward. In addition,  
171 additional covid-19 units were opened both in intensive care and for standard care, following  
172 intensive staff training. Thus, patient care with full PPE including FFP2 masks of all identified  
173 covid-19 patients was standard of care from the beginning of the pandemic, and even though  
174 supply was scarce throughout the first two months, application of strict protocols to limit  
175 wasteful use of equipment allowed sufficient supply all through the pandemic. When first

176 infections in staff members occurred, several further steps were undertaken starting with the  
177 universal use of face masks in all clinical settings, and measures were intensified further after  
178 a nosocomial outbreak on one of the haematology wards.<sup>17</sup> In addition to separate covid-19  
179 units, use of full PPE in all covid-19 care, and use of surgical face masks in all clinical units of  
180 the hospital, universal screening of all hospital admissions was instituted at April 20, with a  
181 roll-out period of about ten days until full adherence across all hospital departments. In  
182 addition, RT-PCR testing of staff at risk was offered as of May 11, but this measure was  
183 primarily instituted as a reassurance measure for our staff rather than an infection control  
184 measure.

185

### 186 **Study procedures**

187 During all three sampling periods, serum samples were drawn from the study participants. A  
188 semi-quantitative SARS-CoV-2 IgG enzyme-linked immunosorbent assay (ELISA) targeting the  
189 S1-Domain of the S-protein spike protein subunit was performed using a commercial kit  
190 (Euroimmun Medizinische Labordiagnostika, Lübeck, Germany). Testing procedures were  
191 performed according to the manufacturer's instructions. According to the manufacturer, a  
192 ratio of  $\geq 1.1$  should be regarded as positive. The manufacturer reports a specificity of 99.3%.  
193 We have recently independently validated those results and showed a specificity of 99.1%.<sup>20</sup>  
194 However, an optimized IgG ratio of  $\geq 1.5$ , has been shown to display a specificity of 100% by  
195 us and by others.<sup>21</sup> Therefore, we used both the manufacturer's and this more stringent cut-  
196 off value for positive results to account for optimal specificity in a low prevalence  
197 environment. Given the sequential testing in our study population and the expected rise of  
198 IgG antibody ratio  $\geq 1.5$  at some time point in infected individuals, this cut-off value is  
199 considered the best compromise for optimum sensitivity and specificity. Study participants  
200 were classified as seropositive in all future sampling periods, if they had an IgG antibody ratio  
201  $\geq 1.5$  at least once, even if antibody ratios waned over time. This was found to be the case in  
202 three study participants, who became seronegative at SP 3. However, in order to also look at  
203 the data with maximum sensitivity, we also analyzed the participants with a ratio of  $>1.1$ .

204

205

206

207

208 **Statistical analyses**

209 Results were subjected to statistical analysis using SPSS 20.0 (IBM, Armonk, NY, USA). Fishers'  
210 exact test was used to the determine association between two categorical variables. A two-  
211 sided P value less than 0.05 was considered significant.

212

213 **Patient and public involvement**

214 The study was presented to and approved by the academic and non-academic workers  
215 representation boards of our hospital and the design agreed with both boards as well as the  
216 management board of the hospital.

217

218 **RESULTS**

219 **Study population**

220 A total of 1253 individuals were included during SP 1, which represent around 11% of all  
221 employees at our centre (table 2).

222

223

224

225

226

227

228

229

230

231

232

233

234

235

236

237

238

239



240 **Table 2 - Characterization of the study population**

|                          |             |
|--------------------------|-------------|
| <b>n</b>                 | 1253        |
| <b>Sex, n (%)</b>        |             |
| Female                   | 934 (74.5)  |
| Male                     | 308 (24.6)  |
| Diverse                  | 11 (0.9)    |
| <b>Age</b>               |             |
| Range, years             | 16-69       |
| Mean, years              | 38.4        |
| <b>Occupation, n (%)</b> |             |
| HCW                      | 1026 (81.9) |
| <i>Category</i>          |             |
| - Nurse                  | 444 (35.4)  |
| - Physician              | 275 (21.9)  |
| - Medical technician     | 105 (8.4)   |
| - Medical student        | 73 (5.8)    |
| - Physiotherapist        | 15 (1.2)    |
| - Other                  | 114 (9.1)   |
| <i>Location</i>          |             |
| - Regular ward           | 332 (26.5)  |
| - Outpatient clinic      | 234 (18.7)  |
| - Intensive care unit    | 130 (10.4)  |
| - Operating room         | 111 (8.9)   |
| - Emergency department   | 63 (5.0)    |
| - Other                  | 156 (12.5)  |
| Non-HCW                  | 227 (18.1)  |

241

242

243 All study participants participated at the second follow up visit, but 23 (1.8%) missed the first

244 follow-up visit. The average age of the study cohort was 38.4 years; 934 were women and 308

245 were men. The majority of participants (n=1026, 81.9%) were HCWs such as nurses (n=444,

246 35.4%), medical doctors (n=275, 21.9%), medical technicians with regular patient contact  
 247 (n=105, 8.4%) and physiotherapists (n=15, 1.2%). Altogether, the participants well  
 248 represented the average workforce of our centre, consisting of 30.1% nurses, 25.8% medical  
 249 doctors, and 44.1% other staff members, with a somewhat higher proportion of front-line  
 250 HCWs in the study. Study participants were recruited from all occupational areas of our  
 251 hospital including regular wards (n=332, 26.5%), outpatient clinics (n=234, 18.7%), the  
 252 intensive care unit (n=130, 10.4%) and the emergency department (n=63, 5.0%). The  
 253 remainder of 227 (18.1%) participants not classified as HCWs were research scientists,  
 254 administrative staff or belonged to other occupational groups not directly involved in patient  
 255 care. Information on contact with covid-19 was provided by 1253 individuals at SP 1, 1169  
 256 individuals at SP 2, and 1110 individuals at SP 3 (table 3).

257

258 **Table 3 - Occupational exposure of the study population**

|                                         | <b>Seronegative</b> | <b>Seropositive SP 1</b> | <b>Seroconversion SP 2</b> | <b>Seroconversion SP 3</b> |
|-----------------------------------------|---------------------|--------------------------|----------------------------|----------------------------|
| <b>n</b>                                | 1231                | 10                       | 10                         | 2                          |
| <b>Occupation, n (%)</b>                |                     |                          |                            |                            |
| HCW                                     | 1005 (81.6)         | 9 (90.0)                 | 10 (100)                   | 2 (100)                    |
| - Nurse                                 | 434 (40.0)          | 6 (60.0)                 | 4 (40.0)                   | 0 (0)                      |
| - Physician                             | 266 (22.4)          | 2 (20.0)                 | 5 (50.0)                   | 2 (100)                    |
| - Other                                 | 305 (23.2)          | 0 (0)                    | 1 (10.0)                   | 0 (0)                      |
| Non-HCW                                 | 226 (22.5)          | 1 (10.0)                 | 0                          | 0 (0)                      |
| <b>Contact to covid-19 cases, n (%)</b> |                     |                          |                            |                            |
| Total                                   | 405 (32.9)          | 6 (60.0)                 | 9 (90.0)                   | 2 (100)                    |
| Patients                                | 281 (22.8)          | 3 (30.0)                 | 6 (60.0)                   | 2 (100)                    |
| - only with PPE                         | 218 (17.7)          | 2 (20.0)                 | 2 (20.0)                   | 1 (50.0)                   |
| - without PPE                           | 63 (5.1)            | 1 (10.0)                 | 4 (40.0)                   | 1 (50.0)                   |
| Colleagues                              | 137 (11.3)          | 2 (20.0)                 | 1 (10.0)                   | 0 (0)                      |
| Community                               | 31 (2.5)            | 1 (10.0)                 | 3 (30.0)                   | 0 (0)                      |

259

260

261 A total of 23.3% (n=292) of participants reported having been in contact with known covid-19  
262 patients. The majority of those (n=223) worked exclusively in the direct care of patients with  
263 diagnosed SARS-CoV-2 infections and thus reported to always be equipped with appropriate  
264 PPE. Another 69 HCWs had contact with patients that were diagnosed with covid-19 only  
265 later, i.e. after exposure, and did therefore not wear adequate PPE at the time. Occupational  
266 contact to infected colleagues was reported by 11.2% (n=140), and known community  
267 contacts by 2.8% (n=35) of participants.

268

### 269 **Serological results**

270 At the initial screening period a total of 0.8% (n=10, 95% confidence interval [CI] 0.3 to 1.3)  
271 participants were found to be SARS-CoV-2 seropositive (figure 1). Another ten individuals,  
272 representing 0.8% of all study participants at SP 2, showed seroconversion at the first follow-  
273 up visit, giving a seroprevalence of 1.6% (95% CI 0.9 to 2.3). At SP 3, two more individuals had  
274 developed SARS-CoV-2 IgG antibodies, giving a seroconversion rate of 0.16% between SP 2  
275 and SP 3, or 0.08% per month, and thus a total seroprevalence of 1.8% (n=22, 95% CI 1.0 to  
276 2.5) by the end of the study when using the optimized IgG ratio of  $\geq 1.5$ . One of the two  
277 participants showing seroconversion only at SP 3 had indeed a positive RT-PCR for SARS-CoV-  
278 2 and missed the first follow-up visit since he was in quarantine. While it is likely that that this  
279 seroconversion took place before SP 2, we have no proof of this, thus the case was counted  
280 as converting in the second observation period.

281 Three participants with an IgG ratio of  $\geq 1.5$  at SP 1 subsequently had a negative test result at  
282 SP 2 and SP 3 respectively suggesting that their infection had occurred early. This  
283 demonstrates that a cross-sectional study with a single measurement only at SP 3 would have  
284 missed these three infections. When analyzing the serological data with of maximum  
285 sensitivity, i.e. with a cut-off value of  $\geq 1.1$ , the overall results were very similar: 19  
286 participants showed anti-SARS-CoV2 antibodies with a ratio  $\geq 1.1$  at SP 1, another 13  
287 participants showed seroconversion during the first month between SP 1 and SP 2. Only 2  
288 additional participants showed seroconversion with this lower cut-off in the subsequent two  
289 months, bringing the total of possible seroconverters in the last two months up to four, or  
290 two per month (figure 2).

291

292

### 293 **RT-PCR testing history of seroconverted participants**

294 Out of all clearly seropositive study participants, a total of 40.9% (n=9), one of them before  
295 SP 1 and the others between SP 1 and SP 2, had been diagnosed with covid-19 by RT-PCR and  
296 thus had been placed under quarantine during the study period. Another six seropositive  
297 HCWs reported that they had at least one nasopharyngeal swab performed due to symptoms  
298 or close contact with a covid-19 case but were tested negative at that time. The remainder of  
299 seven clearly seropositive individuals had not been tested by RT-PCR at all.

300

### 301 **Risk factors for seroconversion**

302 Complete information on symptoms throughout the study period was provided by 1061  
303 (84.7%) of the study participants. Of those, 54.9% (n=582) reported covid-19 related  
304 symptoms (see supplementary table). Only 10.6% (n=112) did not report any symptoms  
305 throughout the study period, the rest reported symptoms not considered typical for covid-  
306 19. Typical SARS-CoV-2 symptoms were reported by 72.7% (n=16) of seropositive and 54.4%  
307 (n=566) of seronegative study participants (P=0.4). The probable source of infection could be  
308 identified for the majority of seropositive study participants. A total of six HCWs presumably  
309 got infected when caring for patients that were only subsequently diagnosed with covid-19  
310 and had thus not used appropriate PPE at the time of exposure. Five HCWs most likely  
311 contracted SARS-CoV-2 while caring for covid-19 patients with adequate PPE. Other probable  
312 infection routes in our cohort were close contact with infected colleagues (n=3), community  
313 transmission in high-risk regions (n=3), and infected household contacts (n=1). For the  
314 remainder of four seropositive employees, the source of infection could not be established.  
315 Seropositivity was not statistically significantly higher in HCWs (2.0%, n=21/1026) compared  
316 to other hospital workers (0.4%, n=1/227, P=0.16). When only addressing HCWs directly  
317 involved in the care of patients with SARS-CoV-2 infections (3.8%, n=11/292) compared to  
318 other HCWs (1.4%, n=10/734, P=0.025) seropositivity was significantly increased.  
319 Importantly, both seroconverters of SP3 were not involved in inpatient care, but exclusively  
320 worked in the outpatient clinics.

321

### 322 **DISCUSSION**

323 This study demonstrates a very low overall SARS-CoV-2 seroprevalence in hospital workers at  
324 our tertiary care centre, and the increasing effectiveness of a combination of infection control

325 measures. The low overall in-hospital SARS-CoV-2 transmission rates of healthcare personnel  
326 were achieved despite both substantial community transmission in the city-state of Hamburg,  
327 and, more importantly, a large number of covid-19 patients treated, some with very high and  
328 long-lasting viral loads, at our tertiary care centre. While the relatively early detection of the  
329 first cases in Germany <sup>22</sup> may have increased preparedness, the addition of further  
330 multimodal infection prevention and control measures was instrumental in minimizing  
331 occupational exposure risks. While seropositivity amongst HCWs was initially higher in HCWs  
332 directly involved in the care of patients with SARS-CoV-2 infections compared to other  
333 employees, only two more seroconversions were observed after the implementation of all  
334 multimodal infection during the last two months, and both of these did not involve inpatient  
335 care but seemed to have occurred during outpatient clinics or from the community. Also, one  
336 of those two physicians had been tested positive for SARS-CoV-2 by RT-PCR between SP 1 and  
337 SP 2 and did therefore not attend the first follow-up visit, so that this seroconversion may  
338 also have also occurred the first observation period. Thus, presumably only one study  
339 participant, a physician employed in an outpatient clinic, contracted a SARS-CoV-2 infection  
340 in the two months between SP 2 and SP 3. All other participants were protected despite a  
341 considerable number of covid-19 patients being treated at our centre during that time period  
342 (figure 3). Considerably higher seroprevalence has been reported for HCWs in Belgium (6,4 –  
343 12,6%) <sup>23 24</sup>, Spain (11 – 31,6%) <sup>25 26</sup>, the United Kingdom (24 - 43.5%) <sup>27 28</sup> and the United  
344 States of America (7,6 - 36%) <sup>29 30</sup>. Those high infection rates are likely to be at least partially  
345 attributable to insufficient protection of exposed HCWs. While the effectiveness of universal  
346 use of face masks at hospitals has been shown to significantly decrease hospital transmission  
347 <sup>67</sup>, shortages of appropriate PPE for HCWs in many hospitals have emerged particularly during  
348 the early phase of the pandemic. However, adequate PPE when caring for confirmed covid-  
349 19 patients alone is not sufficient to prevent healthcare transmission, since asymptomatic  
350 and pre-symptomatic individuals can play a pivotal role in the transmission of SARS-CoV-2.<sup>4</sup>  
351 Also at our centre, the repeated detection of SARS-CoV-2 positive yet asymptomatic patients  
352 presented an important exposure risk leading to occupational infections. Systematic RT-PCT  
353 testing of all hospital admissions, either prior to scheduled admissions or in the emergency  
354 department, instituted at the end of April, reduced this infection risk to practically zero. The  
355 fact that three HCWs seroconverted during the study period despite reporting use of  
356 appropriate PPE when caring for covid-19 patients underlines that PPE alone is not sufficient

357 to prevent viral transmission to HCWs. To our surprise, the majority of seropositive study  
358 participants had not been diagnosed with SARS-CoV-2 infections despite a very low threshold  
359 in our hospital for RT-PCR screening, with more than 7.300 nasopharyngeal swab  
360 examinations of hospital HCWs performed during the study period. Furthermore, symptoms  
361 compatible with covid-19 were widely prevalent in healthcare professionals regardless of  
362 serological results, a number of seropositive employees did not report any such symptoms  
363 and were thus not tested. This demonstrates that symptom-based testing of HCWs, while an  
364 important tool to mitigate nosocomial infections, has limited sensitivity and very low  
365 specificity in detecting infected HCWs. Complete protection of HCWs is not only helpful for  
366 their direct protection but is also key for preventing nosocomial infections in patients.

367

### 368 **Limitations**

369 There are some limitations to our study: firstly, we did not recruit a strictly representative  
370 sample of healthcare professionals at our institution, since participation was voluntary.  
371 However, the distribution of professions was close to the overall hospital workforce  
372 distribution. We included a somewhat higher proportion of clinically exposed HCWs, in  
373 particular front-line HCWs from the emergency department, intensive care and infectious  
374 diseases departments, most likely because these HCWs were highly exposed and thus more  
375 motivated to participate in the study. Secondly, since several multimodal infection control  
376 interventions were sequentially adopted and the study did not include a control group, this  
377 study is not able to answer the question which measures are most effective in preventing  
378 healthcare transmission, and which might have been superfluous. Thirdly, sensitivity and  
379 specificity of serological assays is limited, so a precise assessment of the number of infected  
380 HCWs is not possible. However, the results were independent of the cut-off levels used for  
381 serological testing (figure 2), supporting the reliability of the results.

382

### 383 **Conclusion**

384 We report a very low seroprevalence amongst HCWs and other healthcare professionals at  
385 our tertiary care centre at the beginning of the covid-19 epidemic and very few  
386 seroconversions after the implementation of multimodal infection prevention and control  
387 interventions. When in addition to personal protection and universal face masks RT-PCR  
388 screening of hospital admissions was instituted, occupational transmission could be brought

389 down to zero cases in inpatient care and only one or two related to outpatient clinics. Taken  
390 together, our findings demonstrate that multimodal infection control measures are able to  
391 effectively prevent healthcare transmission for SARS-CoV-2, and thus protect both HCWs and  
392 patients.

393

#### 394 **Contributors**

395 TTB, DS, JSzW, and AWL contributed equally to this paper. TTB, DS, JSzW, and AWL conceived  
396 and designed the study. TTB, SL, VS, JK, MT, and FU contributed to recruitment of healthcare  
397 professionals, data collection and data analysis. DS, ML and JKK contributed to literature  
398 search, data collection and data analysis. TTB and DS contributed to data visualization. SH, SS,  
399 MMA, ML, and JKK contributed to data interpretation. TTB, JSzW, and AWL drafted the  
400 manuscript. DS, SH, SS and ML reviewed and edited the manuscript. TTB, DS, JSzW, and AWL  
401 are the guarantors. The corresponding author attests that all listed authors meet authorship  
402 criteria and that no others meeting the criteria have been omitted

403

#### 404 **Transparency declaration**

405 The guarantors affirm that this manuscript is an honest, accurate, and transparent account of  
406 the study being reported; that no important aspects of the study have been omitted; and that  
407 any discrepancies from the study as planned (and, if relevant, registered) have been  
408 explained.

409

#### 410 **Funding**

411 The authors received no external funding for this work.

412

#### 413 **Competing interests**

414 All authors have completed the ICMJE uniform disclosure form at  
415 [www.icmje.org/coi\\_disclosure.pdf](http://www.icmje.org/coi_disclosure.pdf) and declare: AWL had a material transfer agreement with  
416 Euroimmun GmbH, which included ten ELISA plates as well as technical help provided by the  
417 company when setting up the newly established ELISA. All other authors declare no support  
418 from any organisation for the submitted work. All authors declare no financial relationships  
419 with any organisations that might have an interest in the submitted work in the previous three

420 years; no other relationships or activities that could appear to have influenced the submitted  
421 work.

422

### 423 **Ethical approval**

424 The study protocol was reviewed and approved by the Ethics Committee of the Medical  
425 Council of Hamburg (PV 7298). Written informed consent was obtained by all study  
426 participants prior to enrolment.

427

### 428 **Dissemination to participants and related patient and public communities**

429 The findings of this study will be disseminated to all departments of the University Medical  
430 Center Hamburg-Eppendorf and to all employees of our institution via an internal newsletter.

431

### 432 **Acknowledgments**

433 We thank all study participants and departments of the University Medical Centre Hamburg-  
434 Eppendorf for active participation in the study. We thank Sabrina Kreß, Jennifer Wigger,  
435 Martina Schulz, Corinna Eggers, Angelika Schmidt, Silke Kummer, Robin Woost, Nils  
436 Dittberner, and Marcus Wurlitzer for excellent technical assistance.

437

### 438 **Data sharing**

439 No additional data available.

440

### 441 **References**

- 442 1. Zhan M, Qin Y, Xue X, et al. Death from Covid-19 of 23 Health Care Workers in China. *N*  
443 *Engl J Med* 2020 doi: 10.1056/NEJMc2005696
- 444 2. Remuzzi A, Remuzzi G. COVID-19 and Italy: what next? *Lancet* 2020;395(10231):1225-28.  
445 doi: 10.1016/s0140-6736(20)30627-9
- 446 3. Petersen E, Hui D, Hamer DH, et al. Li Wenliang, a face to the frontline healthcare worker.  
447 The first doctor to notify the emergence of the SARS-CoV-2, (COVID-19), outbreak.  
448 *Int J Infect Dis* 2020;93:205-07. doi: 10.1016/j.ijid.2020.02.052
- 449 4. Arons MM, Hatfield KM, Reddy SC, et al. Presymptomatic SARS-CoV-2 Infections and  
450 Transmission in a Skilled Nursing Facility. *N Engl J Med* 2020;382(22):2081-2090. doi:  
451 10.1056/NEJMoa2008457



- 452 5. Gandhi M, Yokoe DS, Havlir DV. Asymptomatic Transmission, the Achilles' Heel of Current  
453 Strategies to Control Covid-19. *N Engl J Med* 2020 doi: 10.1056/NEJMe2009758
- 454 6. Liu M, Cheng SZ, Xu KW, et al. Use of personal protective equipment against coronavirus  
455 disease 2019 by healthcare professionals in Wuhan, China: cross sectional study.  
456 *BMJ* 2020;369:m2195. doi: 10.1136/bmj.m2195
- 457 7. Wang X, Ferro EG, Zhou G, et al. Association Between Universal Masking in a Health Care  
458 System and SARS-CoV-2 Positivity Among Health Care Workers. *JAMA* 2020 doi:  
459 10.1001/jama.2020.12897
- 460 8. Pan A, Liu L, Wang C, et al. Association of Public Health Interventions With the  
461 Epidemiology of the COVID-19 Outbreak in Wuhan, China. *JAMA* 2020;323(19):1-9.  
462 doi: 10.1001/jama.2020.6130
- 463 9. Sutton D, Fuchs K, D'Alton M, et al. Universal Screening for SARS-CoV-2 in Women  
464 Admitted for Delivery. *N Engl J Med* 2020;382(22):2163-64. doi:  
465 10.1056/NEJMc2009316
- 466 10. Al-Shamsi HO, Coomes EA, Alrawi S. Screening for COVID-19 in Asymptomatic Patients  
467 With Cancer in a Hospital in the United Arab Emirates. *JAMA Oncol* 2020 doi:  
468 10.1001/jamaoncol.2020.2548
- 469 11. Treibel TA, Manisty C, Burton M, et al. COVID-19: PCR screening of asymptomatic health-  
470 care workers at London hospital. *The Lancet* 2020 doi: 10.1016/s0140-  
471 6736(20)31100-4
- 472 12. Black JRM, Bailey C, Przewrocka J, et al. COVID-19: the case for health-care worker  
473 screening to prevent hospital transmission. *Lancet* 2020;395(10234):1418-20. doi:  
474 10.1016/s0140-6736(20)30917-x
- 475 13. Ranney ML, Griffeth V, Jha AK. Critical Supply Shortages - The Need for Ventilators and  
476 Personal Protective Equipment during the Covid-19 Pandemic. *N Engl J Med*  
477 2020;382(18):e41. doi: 10.1056/NEJMp2006141
- 478 14. Wang J, Zhou M, Liu F. Reasons for healthcare workers becoming infected with novel  
479 coronavirus disease 2019 (COVID-19) in China. *J Hosp Infect* 2020;105(1):100-01. doi:  
480 10.1016/j.jhin.2020.03.002
- 481 15. World Health Organization (WHO) Coronavirus disease (COVID-2019) press briefings.  
482 [https://www.who.int/docs/default-source/coronaviruse/transcripts/covid-19-](https://www.who.int/docs/default-source/coronaviruse/transcripts/covid-19-virtual-press-conference---17-july.pdf?sfvrsn=dd7f91a1_0)  
483 [virtual-press-conference---17-july.pdf?sfvrsn=dd7f91a1\\_0](https://www.who.int/docs/default-source/coronaviruse/transcripts/covid-19-virtual-press-conference---17-july.pdf?sfvrsn=dd7f91a1_0) [Accessed on 29 July 2020]

- 484 16. Robert Koch Institute. Coronavirus Disease 2019 (COVID-19) Daily Situation Report of  
485 the Robert Koch Institute.  
486 [https://www.rki.de/DE/Content/InfAZ/N/Neuartiges\\_Coronavirus/Situationsberichte](https://www.rki.de/DE/Content/InfAZ/N/Neuartiges_Coronavirus/Situationsberichte/2020-07-27-en.pdf?__blob=publicationFile)  
487 [/2020-07-27-en.pdf?\\_\\_blob=publicationFile](https://www.rki.de/DE/Content/InfAZ/N/Neuartiges_Coronavirus/Situationsberichte/2020-07-27-en.pdf?__blob=publicationFile) [Accessed on 29 July 2020]
- 488 17. Weisel KC, Morgner-Miehlke A, Petersen C, et al. Implications of SARS-CoV-2 Infection  
489 and COVID-19 Crisis on Clinical Cancer Care: Report of the University Cancer Center  
490 Hamburg. *Oncol Res Treat* 2020;43(6):307-13. doi: 10.1159/000508272
- 491 18. Harris PA, Taylor R, Thielke R, et al. Research electronic data capture (REDCap)--a  
492 metadata-driven methodology and workflow process for providing translational  
493 research informatics support. *J Biomed Inform* 2009;42(2):377-81. doi:  
494 10.1016/j.jbi.2008.08.010
- 495 19. Harris PA, Taylor R, Minor BL, et al. The REDCap consortium: Building an international  
496 community of software platform partners. *J Biomed Inform* 2019;95:103208. doi:  
497 10.1016/j.jbi.2019.103208
- 498 20. Pflüger LS, Bannasch JH, Brehm TT, et al. Clinical evaluation of five different automated  
499 SARS-CoV-2 serology assays in a cohort of hospitalized COVID-19 patients. *J Clin Virol*  
500 2020:104549. doi: 10.1016/j.jcv.2020.104549
- 501 21. Meyer B, Torriani G, Yerly S, et al. Validation of a commercially available SARS-CoV-2  
502 serological Immunoassay. *medRxiv* 2020:2020.05.02.20080879. doi:  
503 10.1101/2020.05.02.20080879
- 504 22. Stafford N. Covid-19: Why Germany's case fatality rate seems so low. *BMJ*  
505 2020;369:m1395. doi: 10.1136/bmj.m1395
- 506 23. Steensels D, Oris E, Coninx L, et al. Hospital-Wide SARS-CoV-2 Antibody Screening in  
507 3056 Staff in a Tertiary Center in Belgium. *JAMA* 2020 doi: 10.1001/jama.2020.11160
- 508 24. Martin C, Montesinos I, Dauby N, et al. Dynamic of SARS-CoV-2 RT-PCR positivity and  
509 seroprevalence among high-risk health care workers and hospital staff. *J Hosp Infect*  
510 2020 doi: 10.1016/j.jhin.2020.06.028
- 511 25. Garcia-Basteiro AL, Moncunill G, Tortajada M, et al. Seroprevalence of antibodies against  
512 SARS-CoV-2 among health care workers in a large Spanish reference hospital.  
513 *medRxiv* 2020:2020.04.27.20082289. doi: 10.1101/2020.04.27.20082289

- 514 26. Galan I, Velasco M, Casas ML, et al. SARS-CoV-2 seroprevalence among all workers in a  
515 teaching hospital in Spain: unmasking the risk. *medRxiv* 2020:2020.05.29.20116731.  
516 doi: 10.1101/2020.05.29.20116731
- 517 27. Houlihan C, Vora N, Byrne T, et al. SARS-CoV-2 virus and antibodies in front-line Health  
518 Care Workers in an acute hospital in London: preliminary results from a longitudinal  
519 study. *medRxiv* 2020:2020.06.08.20120584. doi: 10.1101/2020.06.08.20120584
- 520 28. Shields AM, Faustini SE, Perez-Toledo M, et al. SARS-CoV-2 seroconversion in health care  
521 workers. *medRxiv* 2020:2020.05.18.20105197. doi: 10.1101/2020.05.18.20105197
- 522 29. Mansour M, Leven E, Muellers K, et al. Prevalence of SARS-CoV-2 Antibodies Among  
523 Healthcare Workers at a Tertiary Academic Hospital in New York City. *J Gen Intern*  
524 *Med* 2020:1-2. doi: 10.1007/s11606-020-05926-8
- 525 30. Stubblefield WB, Talbot HK, Feldstein L, et al. Seroprevalence of SARS-CoV-2 Among  
526 Frontline Healthcare Personnel During the First Month of Caring for COVID-19  
527 Patients - Nashville, Tennessee. *Clin Infect Dis* 2020 doi: 10.1093/cid/ciaa936
- 528  
529  
530  
531  
532  
533  
534  
535  
536  
537  
538  
539  
540  
541  
542  
543  
544  
545

546 **Figure 1 - Serologic results of the study population**

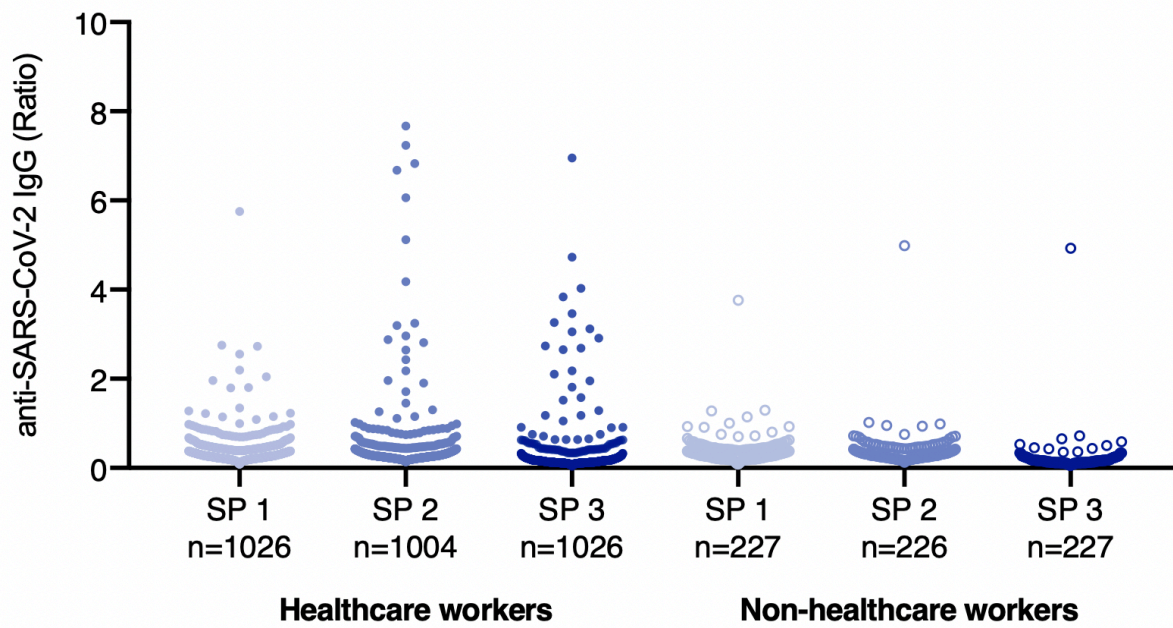

547  
548  
549  
550  
551  
552  
553  
554  
555  
556  
557  
558  
559  
560  
561  
562  
563  
564  
565  
566

567 **Figure 2 – Seroconversion rates in study participants using different cut-off ratios**

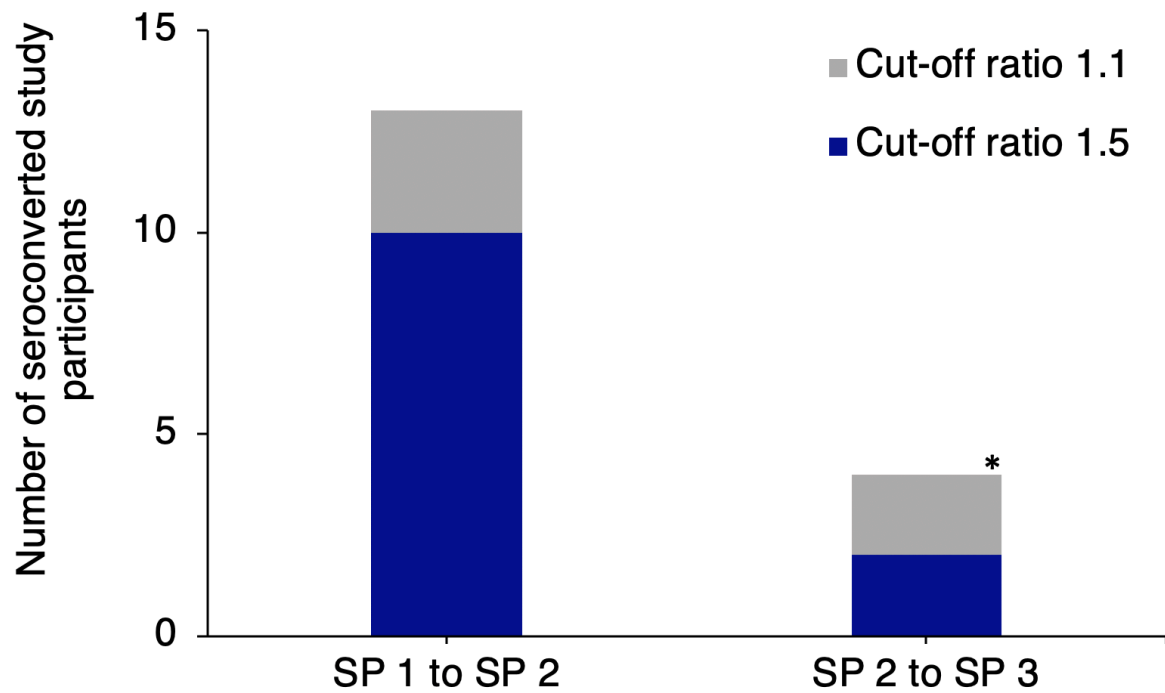

568

569 \*One of the study participants with seroconversion between SP 2 and SP 3 had been tested  
570 positive for SARS-CoV-2 by RT-PCR between SP 1 and SP 2, did therefore not attend the first  
571 follow-up visit, and was thus counted as seroconverting between SP 2 and SP 3.

572

573

574

575

576

577

578

579

580

581

582

583

584

585

586 **Figure 3 - Timeline of the covid-19 epidemic at the University Medical Center Hamburg-**  
587 **Eppendorf and in Hamburg, Germany.**

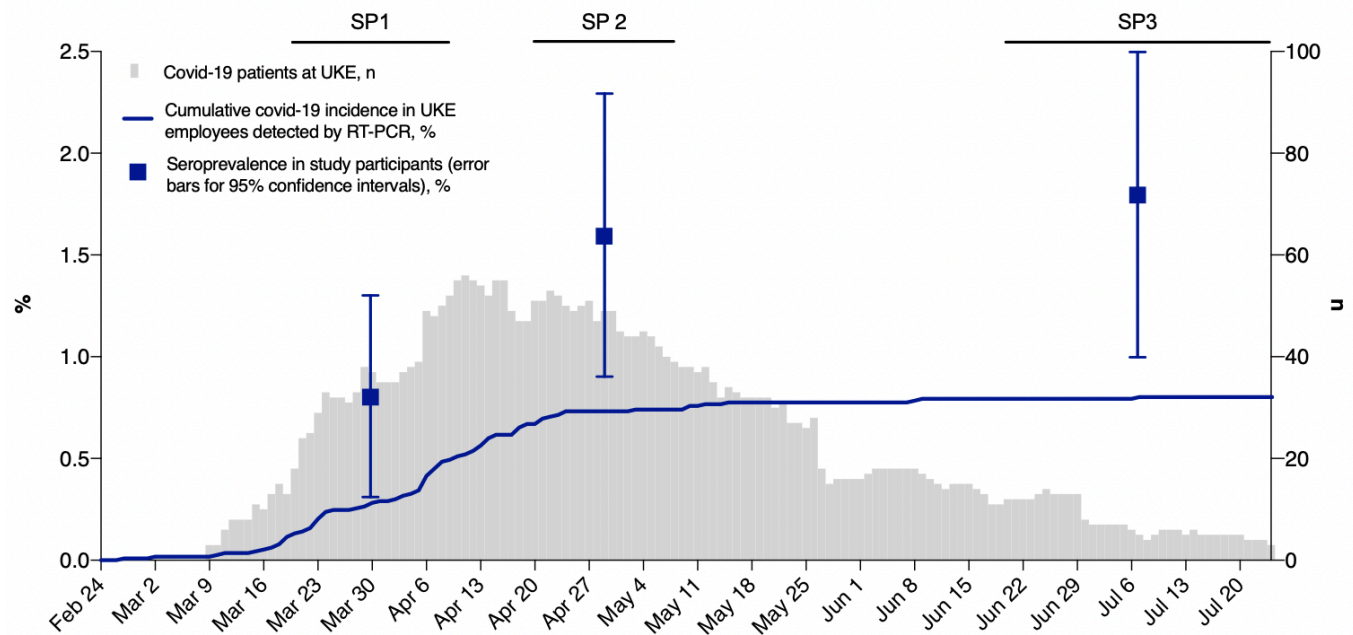

588

589 Grey bars represent the number of covid-19 patients hospitalized at the University Medical  
590 Center Hamburg-Eppendorf (UKE) on the respective days. The blue line represents the  
591 cumulative covid-19 incidence in the 11.348 employees of the UKE detected by the low  
592 threshold contact- and symptom-based RT-PCR screening. The seroprevalence in the study  
593 cohort at the respective sampling periods is represented by blue squares with error bars for  
594 95% confidence intervals.

595

596

597

598

599

600

601

602

603

604

605

606 **Supplementary table – Symptoms reported by seropositive and -negative study participants**

607

|                        | Total (n=1061) | Seropositive (n=22) | Seronegative (n=1041) |
|------------------------|----------------|---------------------|-----------------------|
| Any symptoms, n(%)     | 949 (89.4)     | 20 (90.9)           | 929 (89.1)            |
| Typical symptoms, n(%) | 582 (54.9)     | 16 (72.7)           | 566 (54.4)            |
| Fever, n(%)            | 112 (10.6)     | 8 (36.4)            | 104 (1.0)             |
| Cough, n(%)            | 498 (46.9)     | 11 (50.0)           | 487 (46.8)            |
| Dyspnea, n(%)          | 231 (21.8)     | 9 (40.9)            | 222 (21.3)            |
| Rhinorrhea, n(%)       | 717 (67.7)     | 17 (77.3)           | 700 (67.2)            |
| Sore throat, n(%)      | 560 (52.8)     | 11 (50.0)           | 549 (52.7)            |
| Headache, n(%)         | 704 (66.4)     | 16 (72.7)           | 688 (66.1)            |
| Abdominal pain, n(%)   | 295 (27.8)     | 8 (36.4)            | 287 (27.6)            |
| Muscle aches, n(%)     | 244 (23.0)     | 13 (59.1)           | 231 (22.2)            |
| Nausea, n(%)           | 213 (20.1)     | 8 (36.4)            | 205 (19.7)            |
| Diarrhea, n(%)         | 296 (27.9)     | 8 (36.4)            | 288 (27.7)            |

608

609 Respective symptoms as stated by the study participants at SP 1 or SP 2 for the preceding  
610 month and at SP 3 for the preceding 2 months. Complete information was provided by a total  
611 of 1061 participants.
